# Supplementary material for: ORR in Non-Aqueous Solvent for Li-Air Batteries: The Influence of Doped MnO2-Nanoelectrocatalyst
Source: Nanomaterials (Basel). 2020 Sep 1;10(9):1735. doi: 10.3390/nano10091735 (PMC7558571; doi:10.3390/nano10091735)
Supplement: Supplementary file 1 [file nanomaterials-10-01735-s001.pdf]

## Supplementary Information

# ORR in Non-Aqueous Solvent for Li-Air Batteries: the Influence of Doped MnO<sub>2</sub>-Nanoelectrocatalyst

Eleonora Pargoletti <sup>1,2</sup>, Annalisa Salvi <sup>1</sup>, Alessia Giordana <sup>3</sup>, Giuseppina Cerrato <sup>3</sup>, Mariangela Longhi <sup>1,2</sup>, Alessandro Minguzzi <sup>1,2</sup>, Giuseppe Cappelletti <sup>1,2,\*</sup> and Alberto Vertova <sup>1,2,\*</sup>

<sup>1</sup> Dipartimento di Chimica, Università degli Studi di Milano, Via Golgi 19, 20133 Milan, Italy; eleonora.pargoletti@unimi.it (E.P.), annalisa.salvi@studenti.unimi.it (A.S.), mariangela.longhi@unimi.it (M.L.), alessandro.minguzzi@unimi.it (A.M.)

<sup>2</sup> Consorzio Interuniversitario per la Scienza e Tecnologia dei Materiali (INSTM), Via Giusti 9, 50121, Firenze, Italy

<sup>3</sup> Dipartimento di Chimica & NIS, Università degli Studi di Torino, Via P. Giuria 7, 10125, Turin, Italy; giuseppina.cerrato@unito.it (G.Ce.), alessia.giordana@unito.it (A.G.)

\* Correspondence: giuseppe.cappelletti@unimi.it (G.C.) and alberto.vertova@unimi.it (A.V.); Tel.: +39-02-50314228 (G.C.); +39-02-50314232 (A.V.)

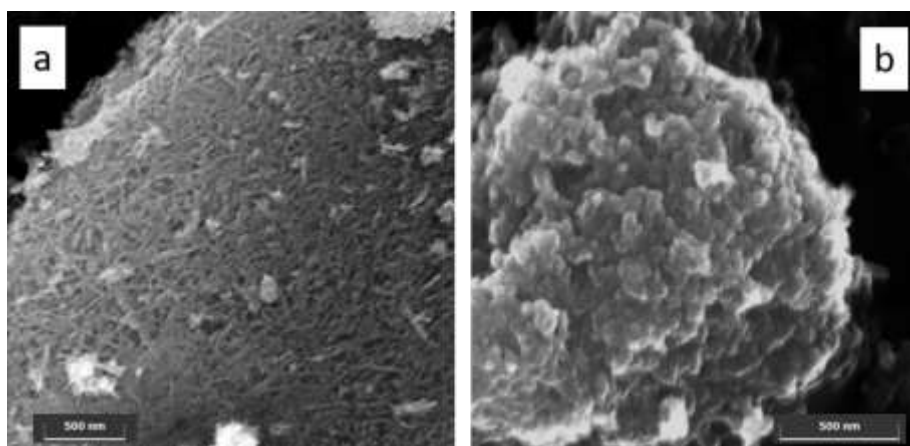

**Figure 1.** FEG-SEM images of (a) 2Co\_MnO<sub>2</sub> and (b) 2Fe\_MnO<sub>2</sub>.

For the sake of clarity, a couple of FEG-SEM images referred to the 2% promoted materials was represented in Figure S1, in order to confirm the role of the dopants in modifying the final surface texture of the samples. The same trend of 5% doped MnO<sub>2</sub> was observed for lower dopants amount, either Co or Fe, since the system promoted by 2% Co still exhibits acicular shape of the particles (see Figure S1a) with the same characteristics of the 5% Co sample (Figure 3b). Analogously, the 2% Fe-doped MnO<sub>2</sub> behaves likewise to its 5% counterpart, as its particles show totally different features (see Figure 3c) if compared to the bare MnO<sub>2</sub>: a low amount of Fe species leads to almost roundish shape with a fast tendency to aggregate (see Figure S1b).

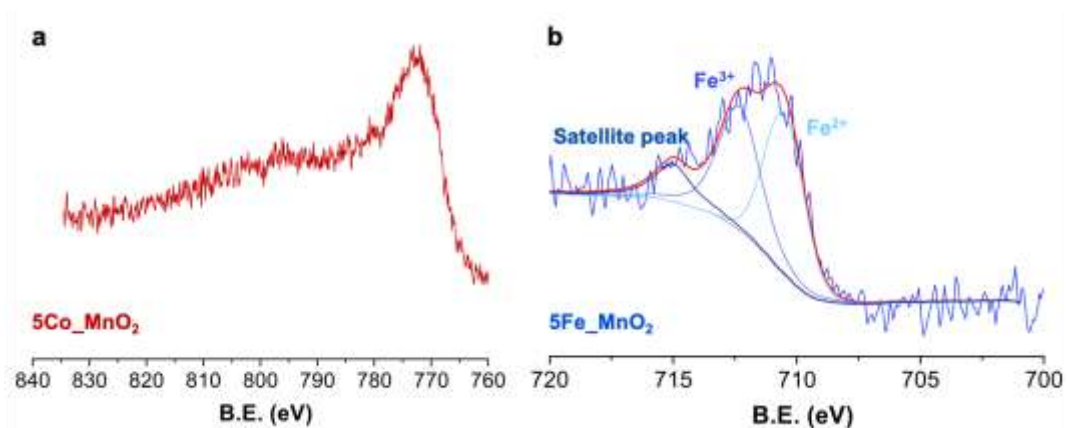

**Figure S2.** XP spectra of (a) Co 2p and (b) Fe 2p regions relative to 5Co\_MnO<sub>2</sub> and 5Fe\_MnO<sub>2</sub> respectively. The Co 2p region was not fitted since it falls within the same range of Mn 2s. Besides, the Fe high-resolution spectrum was deconvoluted into three peaks ascribable to Fe<sup>2+</sup>, Fe<sup>3+</sup> species and a satellite one, according to Biesinger *et al.* [65].
